# Supplementary material
Source: Springer Nature journal article supplement (https://www.springermedizin.de/resource/supplementary/12873_2010_122_MOESM4_ESM.pdf/9431510)

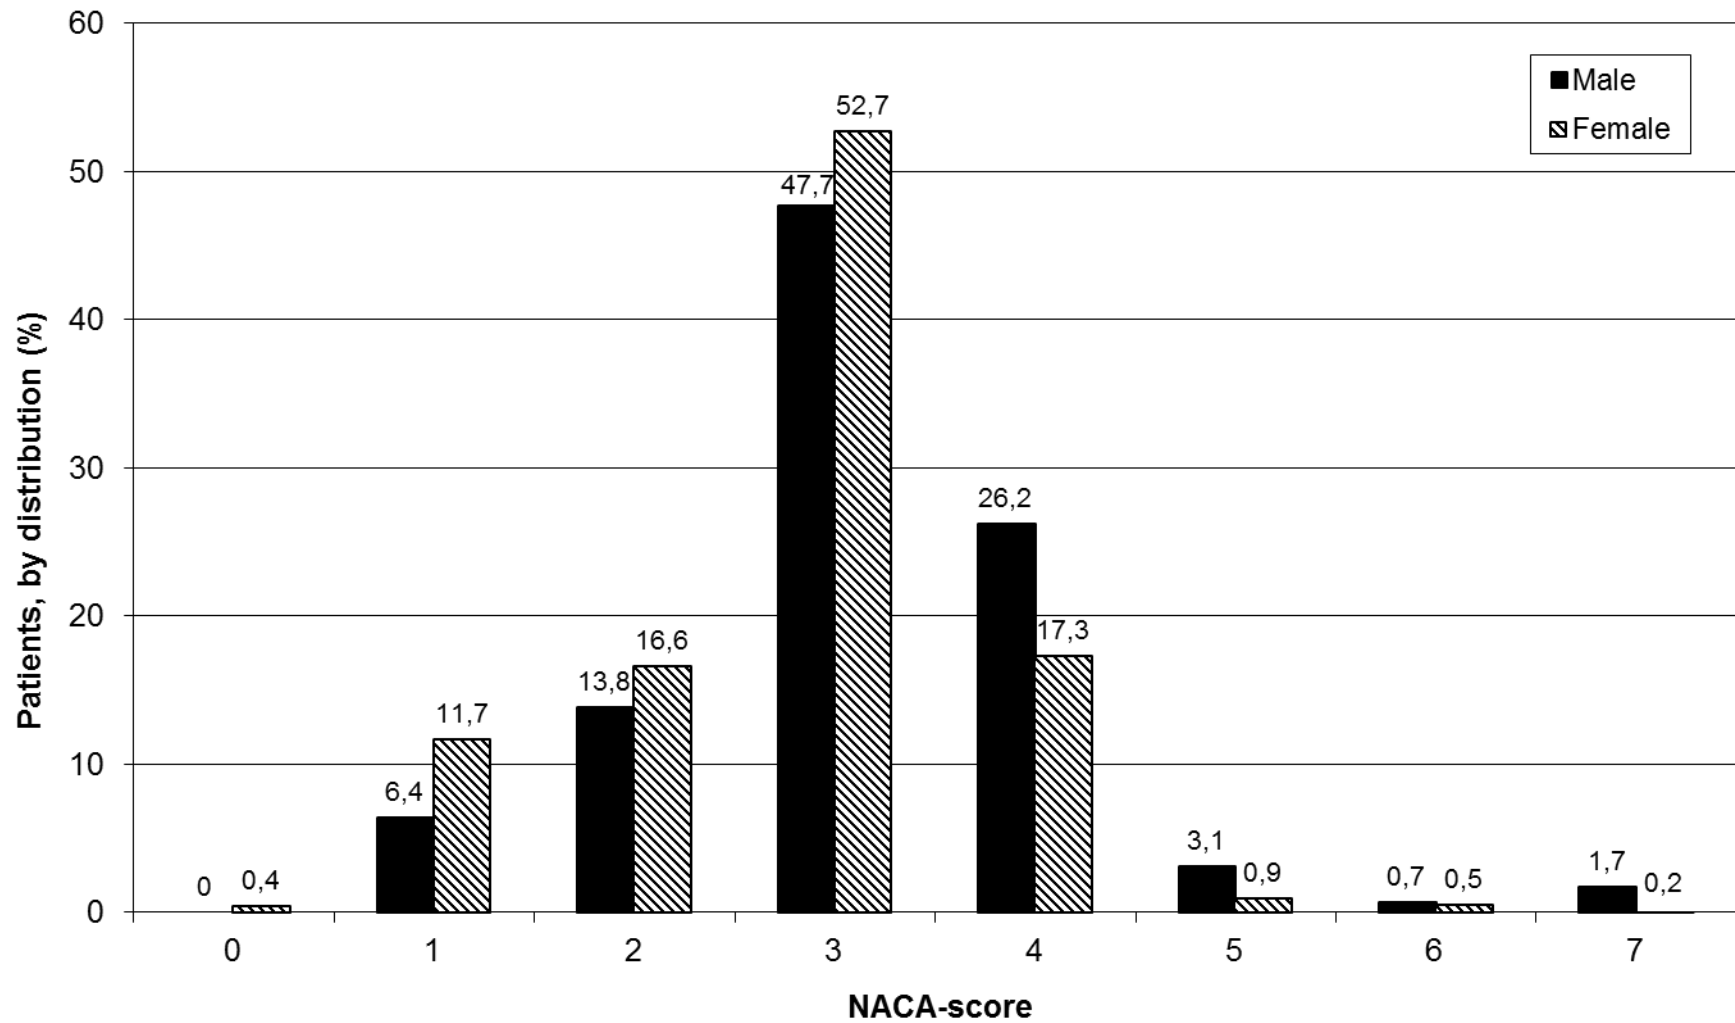

Supplement: MOESM4 [file 9431510]
